1 **Molecular characterization of pathogenic African trypanosomes in biting flies and camels**  
2 **in surra-endemic areas outside the tsetse fly belt in Kenya**

3

4

5 Merid N. Getahun<sup>1\*</sup>, Jandouwe Villinger<sup>1</sup>, Joel L. Bargul<sup>1,2</sup>, Abel Orone<sup>1</sup>, John Ngiela<sup>1</sup>, Peter O.  
6 Ahuya<sup>1</sup>, Jackson M. Muema<sup>1,2</sup>, Rajinder K. Saini<sup>1#</sup>, Baldwin Torto<sup>1,3</sup>, and Daniel K. Masiga<sup>1</sup>.

7 1. International Centre of Insect Physiology and Ecology (*icipe*), Nairobi, P.O. Box 30772-  
8 00100, Kenya

9 2. Department of Biochemistry, Jomo Kenyatta University of Agriculture and  
10 Technology, Nairobi, Kenya

11 3. Department of Zoology and Entomology, University of Pretoria, Private Bag X20, Hatfield  
12 0028, South Africa

13 # Current address: Pestinix-International Pest & Vector Control Specialists, Nairobi, Kenya,

14

15 [\\*mgetahun@icipe.org](mailto:mgetahun@icipe.org)

16

17 Co-author's email addresses

18 Jandouwe Villinger: [jandouwe@icipe.org](mailto:jandouwe@icipe.org)

19 Joel L. Bargul: [jbargul@icipe.org](mailto:jbargul@icipe.org)

20 Abel Orone: [aorone@icipe.org](mailto:aorone@icipe.org)

21 John Ngiela: [jngiela@icipe.org](mailto:jngiela@icipe.org)

22 Peter O. Ahuya: [pahuya@icipe.org](mailto:pahuya@icipe.org)

23 Jackson M. Muema: [jmbithi@icipe.org](mailto:jmbithi@icipe.org)

24 Rajinder K. Saini: [sainirajinder255@gmail.com](mailto:sainirajinder255@gmail.com)

25 Baldwin Torto: [btorto@icipe.org](mailto:btorto@icipe.org)

26 Daniel K. Masiga: [dmasiga@icipe.org](mailto:dmasiga@icipe.org)

27

28

29

30

31 **Abstract**

32 **Background:** African animal trypanosomosis is becoming prevalent beyond its traditionally  
33 defined geographical boundaries and is a threat to animals beyond the tsetse belts in and outside  
34 Africa. However, knowledge of infections with clinically important trypanosome species  
35 and their diversity among field-collected hematophagous biting flies and domestic animals is  
36 limited mainly to tsetse and their mammalian hosts in tsetse-infested areas. This study aimed to  
37 examine the presence of trypanosomes in both biting flies and domestic animals outside the  
38 tsetse belt in northern Kenya, potential mechanical vector species, and their host-feeding  
39 profiles.

40 **Methods:** We screened for pathogenic African trypanosomes in blood samples from domestic  
41 animals and field-trapped flies by microscopy and sequencing of internal transcribed spacer  
42 (ITS1) gene PCR products. We sequenced kinetoplast maxicircle genes to confirm *Trypanosoma*  
43 *brucei* detection and the RoTat 1.2 and kinetoplast minicircle genes to differentiate type-A and  
44 type-B *Trypanosoma evansi*, respectively. Further, we identified the hosts that field-trapped flies  
45 fed on by PCR-HRM and sequencing of 16S rRNA genes.

46 **Results:** *Hippobosca camelina*, *Stomoxys calcitrans*, *Tabanus* spp., and *Pangonia rueppellii* are  
47 potential vectors of trypanosomes outside the tsetse belt in Marsabit County, northern Kenya.  
48 We identified *Trypanosoma* spp., including *Trypanosoma vivax*, *T. evansi*, *T. brucei*, and *T.*  
49 *congolense* in these biting flies as well as in camels (*Camelus dromedarius*). Trypanosomes  
50 detected varied from single up to three trypanosome species in *H. camelina* and camels in areas  
51 where no tsetse flies were trapped. Similar trypanosomes were detected in *Glossina pallidipes*  
52 collected from a tsetse-infested area in Shimba Hills, coastal Kenya, showing the wide  
53 geographic distribution of trypanosomes. Furthermore, we show that these biting flies acquired  
54 blood meals from camels, cattle, goats, and sheep. Phylogenetic analysis revealed diverse  
55 *Trypanosoma* spp. associated with variations in virulence and epidemiology in camels, which  
56 suggests that camel trypanosomosis may be due to mixed trypanosome infections rather than  
57 only surra (*T. evansi*), as previously thought.

58 **Key words:** Surra, camel, non-tsetse transmitted trypanosomes, biting flies, tsetse belt, Kenya.

## 59 **1. Introduction**

60 *Trypanosoma evansi* is one of the most important *Trypanosoma* spp. infecting livestock globally.  
61 Its wide geographic distribution [1–3], mode of transmission [4, 5], zoonotic potential [6, 7],  
62 pathogenicity to several domestic animals [8], high genetic diversity, and variation in virulence  
63 [5, 9] makes it an important parasite. Animal trypanosomosis caused by *T. evansi* is called surra  
64 in camels and is the most lethal disease of camels worldwide [4, 10, 11]. In addition to causing  
65 camel mortality, *T. evansi* infections reduce production of milk, an important staple food and the  
66 primary source of protein for pastoralists. Furthermore, *T. evansi* is an important pathogen in  
67 cattle and buffalo that results in morbidity and mortality and induces higher rates of abortion in  
68 domestic animals in Asia [11, 12].

69 Basic knowledge of the epidemiology and diversity of clinically important trypanosomes  
70 (such as *Trypanosoma vivax*, *T. congolense*, and *T. evansi*) in non-tsetse hematophagous flies  
71 and domestic animals from tsetse-free areas is significantly outweighed by that of tsetse and  
72 trypanosomes studied in tsetse-infested areas. However, several laboratory and semi-field  
73 experiments have demonstrated that different *Trypanosoma* spp., including *T. congolense* [13],  
74 *T. vivax* [14], and *T. evansi* [15], are potentially transmitted to domestic animals by various  
75 biting flies, such as *Stomoxys* spp. and *Tabanus* spp.

76 To evaluate the presence of various *Trypanosoma* spp. and the potential role of non-tsetse  
77 biting flies in their transmission within a tsetse-free area of northern Kenya, we investigated: (i)  
78 the diversity of hematophagous biting flies that could be involved in the mechanical transmission  
79 of trypanosomes; (ii) the identity, and diversity of economically and clinically important  
80 pathogenic trypanosomes within randomly collected and sampled flies and domestic animals,  
81 and (iii) on what vertebrates these biting flies feeding.

## 82 **2. Materials and Methods**

### 83 **2.1. Study sites**

84 Among three study sites, two sites in Marsabit County, northern Kenya, were in Ngurunit  
85 (N01°.74', E 037.29') at the edge of the tsetse distribution map and Shurr, a tsetse free area  
86 (N02°.08', E038°.27') (Fig. 1A-B). The third site was in Nanyuki in central Kenya, which is also  
87 tsetse free area (N00°.41', E036°.90') (Fig. 1A). All the three study sites are characterized by  
88 arid and semi-arid climatic conditions. The main means of livelihood is animal husbandry. The  
89 area has suitable biomass, especially for browsers such as goats and camels. Even though

90 Ngurunit falls within the tsetse distribution map, a previous study reported no tsetse flies in the  
91 area [15] and therefore ideal sites to study non-tsetse transmitted trypanosomes. Furthermore,  
92 Marsabit County, where the two sampling sites are located have high number of camels, 1.3 –  
93 1.9 camels/km<sup>2</sup> [16], making it suitable for camel trypanosomosis studies. Tsetse flies (*G.*  
94 *pallidipes*) were collected from Shimba Hills in Kwale County, coastal Kenya for *Trypanosoma*  
95 spp comparisons.

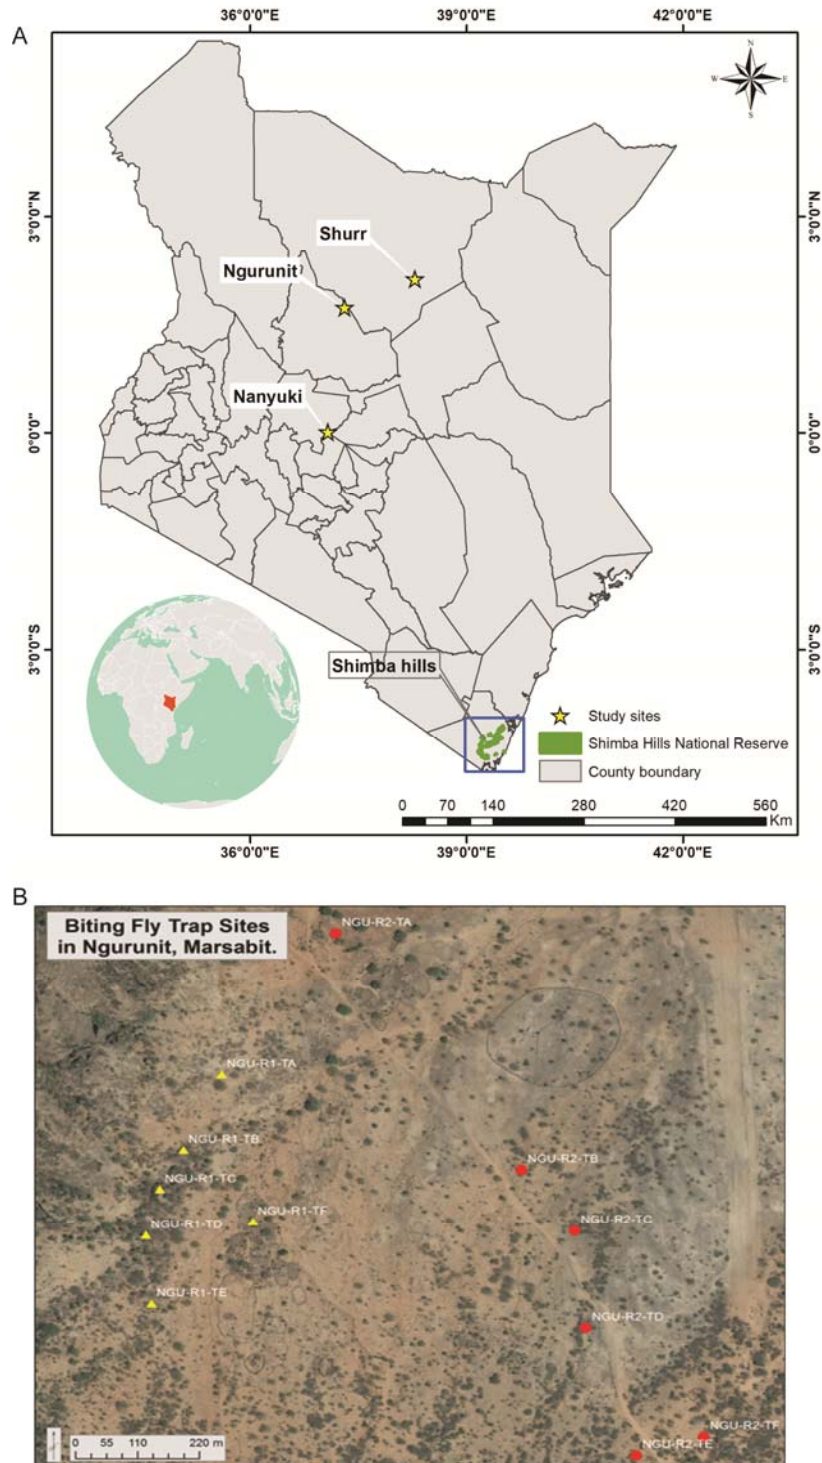

96

97 **Fig. 1. Map of study sites.** (A) Map showing the study sites (B) Map of biting fly trap sites in  
98 Ngurunit village in Marsabit County. Yellow triangles represent the first replication of fly  
99 trapping in Ngurunit, which was in a forested area, and red circles represent the second  
100 replication, which was in an area with sparse vegetation.

## 101 **1.2. Fly trapping**

102 Flies were trapped using monoconical traps [17], placed ~150 m apart. Camel urine odour  
103 dispensed from plastic bottles (release rate was not quantified) was used as an attractant. Biting  
104 flies feeding on camels were collected using sweep nets and preserved in absolute ethanol and  
105 identified using appropriate taxonomic keys [18]. Camels, from which biting flies were  
106 collected, were randomly chosen regardless of their sex, age, or health status of the animal. The  
107 flies were trapped during both dry and rainy seasons using 25 monoconical traps per site for five  
108 days at each season and emptied every 24 hr. The fly trapping sites included thick bushland,  
109 *Acacia* spp. woodlands, watering points, animal enclosures, and open grassland areas (Fig.1B).

110

## 111 **2.3. Fly density per camel**

112 *Hippobosca camelina* and *Stomoxys calcitrans* counts were made by approaching ten randomly  
113 selected camels slowly from the side. An estimate number of *S. calcitrans* and *H. camelina* was  
114 made by counting the total number of flies on the legs and belly of the camel. Counts were made  
115 from a distance of 0.5 to 1 m. Two experienced technicians with expertise in distinguishing  
116 between the target flies performed all the counting. Stable flies could be differentiated from  
117 morphologically-similar house flies by their distinctive feeding posture as they feed parallel to  
118 the camel's body [19], whilst house flies display a more random position when resting on the  
119 camel.

## 120 **2.4. Blood sampling and microscopy**

121 Approximately 5-10 mL of blood was drawn from the jugular vein of camels, goats, sheep,  
122 donkeys, and cattle into vacutainer tubes containing disodium salt of ethylene diamine tetra-  
123 acetate (EDTA) (Plymouth PLG, UK). An aliquot from each vacutainer tube was transferred into  
124 heparinized capillary tubes (75 × 1.5 mm) and spun in a micro-haematocrit centrifuge at 12,000  
125 rpm for 5 minutes to separate the red and white blood cells and plasma, hence concentrating the  
126 trypanosomes [20]. Packed cell volume (PCV), an indicator of the animal's anaemic status, was  
127 measured using Haematocrit Reader (Hawksley & Sons Limited, England) and expressed as a  
128 percentage of PCV to total blood volume. The buffy coat plasma interface was placed onto a  
129 microscope glass slide and examined under a microscope for the presence of moving  
130 trypanosomes. The trypanosome species were provisionally identified based on cell motility and  
131 morphology using wet blood film examination [20, 21]. Furthermore, thin blood smears were

132 prepared from the samples, fixed with methanol, and stained with 10% Giemsa [20]. The stain  
133 was flushed with running tap water and allowed to dry for 35 minutes. Slides were then  
134 examined under the 100× oil immersion objective for trypanosomes and positive cases recorded.  
135 The rest of the well-mixed blood contents were appropriately labelled and stored in liquid  
136 nitrogen for transportation to Nairobi-based *icip*e laboratories for further screening. Domestic  
137 animals (including camels), were randomly sampled from various herds, for up to a maximum of  
138 10% of the herd population to accommodate sampling of more herds. Camels in the herd were  
139 assigned a reference number and numbers were selected randomly for blood sampling. The mean  
140 number of camels per household varied from four to 35 on average in Ngurunit and Shurr sites,  
141 respectively. However, in Nanyuki, with relatively smaller population of camels, only one herd  
142 was sampled. All the identified infected camels were treated with triquin (Vetoquinol<sup>®</sup>) at a dose  
143 of 5 mg/kg body weight [10].

144

## 145 **2.5 DNA extraction from blood and biting flies**

146 Total genomic DNA was extracted from all collected blood samples using DNeasy Blood &  
147 Tissue Kits (Cat No./ID: 69504, Qiagen, Hilden, Germany), as follows: 100 µL of each blood  
148 sample was pipetted into 1.5-mL Eppendorf<sup>®</sup> tubes and mixed with 20 µL proteinase K, and the  
149 volume adjusted to 220 µL with PBS at pH 7.4. Subsequently, 200 µL Buffer AL were added to  
150 the reaction mix, thoroughly mixed and incubated for 10 minutes at 56°C. After the 10-minute  
151 incubation, 200 µL of absolute ethanol were separately pipetted into each tube and vortexed  
152 thoroughly before pipetting the mixture into the DNeasy Mini spin column placed in a 2-mL  
153 collection tube for centrifugation at 8000 rpm for 1 minute. The DNA samples on the spin  
154 columns were separately washed with 500 µL of Buffer AW1 Buffer AW2 preceding elution  
155 into clean 1.5-mL microcentrifuge tubes, with 100 µL Buffer AE. The freshly eluted DNA  
156 samples were stored at -20°C until PCR analysis. Similarly, the total DNA from the crushed guts  
157 of biting flies were extracted and purified after brief surface sterilisation with ethanol and  
158 cleaning with distilled water. A negative extraction control was also performed for  
159 contamination assessment.

160

## 161 **2.6 Identification of trypanosomes in the blood and fly samples**

162 To check the presence of trypanosomes, a random subset of the flies from diverse biting flies  
163 collected were analysed from the whole fly using PCR. To check trypanosomes in blood we  
164 combined light microscopy with more sensitive molecular techniques, primarily using DNA-  
165 based markers [22] that enabled differentiation of trypanosome species and their subgroups. We  
166 employed PCRs targeting the internal transcribed spacer (ITS-1) gene fragment, which is a  
167 conserved gene across all African trypanosomes [23]. The diagnostic PCR assays were carried  
168 out in 10- $\mu$ L reaction mixtures containing 5  $\mu$ L 2 $\times$  DreamTaq mix, 3  $\mu$ L PCR water, 0.5  $\mu$ L ITS-  
169 1 primers (F: 5'-CCGGAAGTTCACCGATATTG-3'; R: 5'-TTGCTGCGTTCTTCAACGAA-  
170 3') [24] and 1  $\mu$ L DNA template. PCR amplification conditions were programmed as follows:  
171 95°C denaturation step for 1 minute, 35 cycles of 95°C for 30 seconds, 61°C for 30 seconds,  
172 72°C for 1 minute and final extension of 72°C for 10 minutes. Additionally, primers designed to  
173 amplify kinetoplast 9S ribosomal RNA subunit (kDNA 12 (modified): 5'-  
174 TTAATGCTATTAGATGGGTGTGG-3'; kDNA 13: 5'-  
175 CTCTCTGGTTCTCTGGGAAATCAA-3') [25] and CO1 (Tb\_kDNA\_COI\_Max1: 5'-  
176 CCCTACAACAGCACCAAGT-3'; Tb\_kDNA\_COI\_Max2: 5'-  
177 TTCACATGGGTTGATTATGG-3') [26] genes were used to differentiate *T. brucei* from *T.*  
178 *evansi* as previously described. To separate *T. evansi* subtypes A and B, we used type A-specific  
179 primers targeting the VDG RoTat 1.2 gene (F: 5'-GCGGGGTGTTTAAAGCAATA-3'; R: 5'-  
180 ATTAGTGCTGCGTGTGTTTCG-3') and type B-specific primers targeting the minicircle gene  
181 (EVAB-1: 5'-ACAGTCCGAGAGATAGAG-3'; EVAB-2: 5'-CTGTACTCTACATCTACCTC-  
182 3') [27, 28]. For each PCR, a negative PCR control (non-template control) was set up alongside  
183 samples (SF1). This enabled detection of contamination during PCR set up.  
184 The PCR amplicons were purified using Quickclean II gel extraction kit (GeneScript USA Inc.,  
185 Piscataway, USA) according to the manufacturer's instructions. Briefly, DNA bands of interest  
186 were excised from the agarose gel with a sharp, clean scalpel (replaced for each sample) into  
187 sterile 1.5-mL Eppendorf tubes and three volumes of binding buffer II added to each sample. The  
188 reaction tubes were then incubated at 55°C for 10 minutes with occasional vortexing until all  
189 gels melted and a pale-yellow mixture was observed. The samples were then transferred into spin  
190 columns and centrifuged at 6000  $\times$ g for 1 minute. Subsequently, the samples were washed with  
191 650  $\mu$ L wash buffer and centrifuged at 12000  $\times$ g for 1 minute. The DNA samples were then



192 eluted from the columns with 50  $\mu$ L elution buffer into sterile 1.5-mL Eppendorf tubes and  
193 stored at  $-20^{\circ}\text{C}$ . Confirmation of the purified DNA was performed by gel electrophoresis and  
194 sent for sequencing at Macrogen (Netherlands).

195 All nucleotide sequences were edited and aligned using the MAFFT plugin in Geneious software  
196 version 11.1.4 [29]. Sequence identities were revealed by querying in the GenBank nr database  
197 using the Basic Local Alignment Search Tool ([www.ncbi.nlm.nih.gov/BLAST/](http://www.ncbi.nlm.nih.gov/BLAST/)). The aligned  
198 ITS-1 sequences were used to construct a maximum likelihood phylogenetic tree using PHYML  
199 v. 3.0 [30]. The phylogeny employed the Akaike information criterion [31] for automatic model  
200 selection and tree topologies were estimated using nearest neighbor interchange (NNI)  
201 improvements over 1,000 bootstrap replicates. The phylogenetic tree was visualized using  
202 FigTree v1.4.2 [32].

203

## 204 **2.7. Bloodmeal source identification in biting flies by PCR – high-resolution melting (HRM)** 205 **analysis**

206 Genomic DNA from blood-fed *H. camelina* and *S. calcitrans* and known vertebrate whole blood  
207 samples as positive controls were isolated using DNeasy Blood and Tissue kit (Cat  
208 No./ID: 69504, Qiagen, Hilden, Germany). Fed flies were selected by observing engorged  
209 abdomens and then the guts of blood-fed flies were crushed and homogenized individually using  
210 ten 2-mm yttria-stabilised zirconia beads in 400  $\mu$ L of cold homogenization phosphate buffered  
211 saline (PBS) to each tube on ice, then agitating for 10 seconds in a Mini-BeadBeater-16  
212 (BioSpec, Bartlesville, OK, USA). The homogenates were then centrifuged for 10 seconds in a  
213 bench top centrifuge (Eppendorf, USA) at 1500 relative centrifugal force at  $4^{\circ}\text{C}$ . Aliquots of 210  
214  $\mu$ L of each homogenate were used for nucleic acid extraction.

215 High-resolution melt profiles from PCR amplicons of different vertebrate 16S rRNA DNA in  
216 100 *H. camelina* were analysed in Applied Biosystems QuantStudio 3 real-time PCR system  
217 (Thermo Scientific, USA) and used to identify the various vertebrate bloodmeal sources in fed  
218 flies as previously described [33, 34]. Blood-meal profiles of vertebrates were specifically  
219 matched to selected domestic and wild animal positive controls. Control vertebrate host samples,  
220 including human, cow (*Bos taurus*), sheep (*Ovis aries*), warthog (*Phacochoerus africanus*),  
221 African buffalo (*Syncerus caffer*), goat (*Capra aegagrus hircus*), elephant (*Loxodonta africana*),

222 Sprague Dawley rat (*Rattus norvegicus*), and camel (*Camelus dromedarius*) served as reference  
223 controls. The 10- $\mu$ L PCR reaction consisted of 1  $\mu$ L DNA template, 6  $\mu$ L of PCR water, and 2  
224  $\mu$ L of 5 $\times$  HOT FIREpol EvaGreen HRM Mix (Solis BioDyne, Tartu, Estonia) and 0.5  $\mu$ M  
225 concentrations of each primer (see [33, 34] for details). The PCR thermal cycling conditions for  
226 cytochrome b were set as follows: initial denaturation 95°C for 15 minutes, 35 cycles of  
227 denaturation at 95°C for 30 seconds, annealing 58°C for 20 seconds, extension 72°C for 30  
228 seconds and final extension of 72°C for 7 minutes with final PCR products kept at 4°C. The  
229 annealing temperature of the 16S rRNA DNA marker was 56°C. Following PCR amplification,  
230 HRM analysis was performed within normalised temperature regions of between 65°C - 78°C  
231 and 88°C - 95°C. The different melt curve profiles of the samples were compared to the  
232 reference standards, and representative samples under each peak were selected for gene  
233 sequencing.

## 234 **2.8 Data analysis**

235 Biting fly densities on camels were compared using the Mann-Whitney test as the data was not  
236 normal following normality according to Levene's test of homogeneity of variance. We used the  
237 following formula developed by [35]:  $n = \ln(\alpha)/\ln(1-p)$  to determine the minimum number of  
238 camels and biting flies to be sampled for trypanosomes detection . We used sensitive molecular  
239 tools for pathogen detection, and we assumed that 3% of field collected flies and camels were  
240 infected at 95% confidence limit, thus,  $\alpha = 0.05$ ,  $P = 0.03$  (probability of detecting infected biting  
241 flies, camel). Sample size  $n = \ln(\alpha)/\ln(1-p)$  therefore  $n = -2.99/-0.03 = 99.6$ , which suggested that  
242 a minimum of 100 randomly sampled camels and biting flies were needed [35]. However, when  
243 biting flies were few, we analyzed 50 flies.

244 Chi-squared tests were used to compare differences in the number of trypanosomes detected in  
245 biting fly species, and among different domestic animals. The independent t-test was used to  
246 compare PCV values between infected and non-infected camels. Blood-meal sources were also  
247 compared using the chi-squared test. All analyses were performed using GraphPad software  
248 (GraphPad Software, Inc, USA). The Shannon diversity index (H) was used to characterise the  
249 diversity of pathogens in biting flies using percent prevalence data and the diversity index of  
250 biting flies between sites was analyzed using number of individuals per trap calculated using  
251 PAST 3.11 ([www.folk.uio.no/ohammer/past/](http://www.folk.uio.no/ohammer/past/)) [36]. The relative feeding index of *H. camelina*

252 and *S. calcitrans* was calculated according to [36, 37] as follows;  $W_i = O_i/P_i$ , where,  $W_i =$   
253 feeding ratio for livestock  $i$ ,  $O_i =$  percentage of livestock,  $I$ , in the blood meals,  $P_i =$  proportion  
254 or percentage of livestock  $i$  available in the environment.

255

256

### 257 3. RESULTS

#### 258 3.1. Diverse biting flies were identified as potential trypanosome vectors in the tsetse-free 259 area

260 We collected a variety of biting flies of the Order Diptera from the study areas using  
261 monoconical traps (Table 1). Similar hematophagous flies were also observed feeding on camels,  
262 including *H. camelina* (Leach), *S. calcitrans* (L), *Pangonia rueppellii* (Jaenn), *Haematopota*  
263 *pluvialis*, and *Tabanus* spp. (Fig. 2A–F). *Hippobosca camelina* and *S. calcitrans* were present all  
264 year-round and observed feeding together on the same camel. The abundance of biting flies on a  
265 given camel varied between biting fly species. For instance, more *H. camelina* flies per camel (n  
266 = 10) were recorded as compared to *S. calcitrans* ( $P < 0.005$  Mann-Whitney Test) (Fig. 2G).  
267 However, the number of other biting flies on camels (*P. rueppellii*, *Tabanus* spp., and *Hae.*  
268 *pluvialis*) were too low for meaningful comparisons.

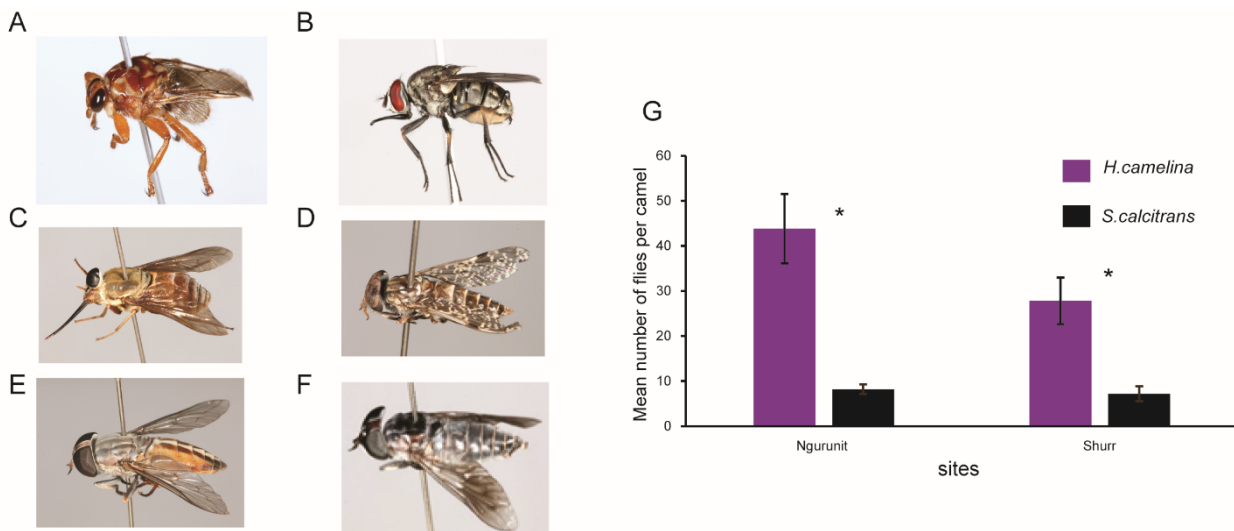

269  
270 Fig. 2. Diversity and abundance of biting flies (A) *H. camelina*, (B) *S. calcitrans*, (C) *P.*  
271 *rueppellii*, (D) *Hae. pluvialis*, (E - F) *Tabanus* spp., (G) Mean number of *H. camelina* and *S.*  
272 *calcitrans* per camel at Ngurunit and Shurr sites, bars represent standard error of the mean,  
273 \*depicts significant differences in fly density,  $P < 0.05$ ,  $N = 10$ .

274

275 The diversity of biting flies varied from place to place; Ngurunit had diverse species of biting  
276 flies (Shannon index,  $H = 1.3$ ), including *H. camelina*, *P. rueppellii*, *Hae. pluvialis*, *S. calcitrans*  
277 and *Tabanus*. Shurr (Shannon index,  $H = 0.6$ ) had all the species of biting flies, except *P.*  
278 *rueppellii*, while Nanyuki (Shannon index,  $H = 0$ ) had only *S. calcitrans*.

279

280 **Table 1. Diversity of biting flies at three sites**

| Site     | <i>H.</i><br><i>camelina</i> | <i>S.</i><br><i>calcitrans</i> | <i>Tabanus</i><br>spp. | <i>P.</i><br><i>rueppellii</i> | <i>Hae.</i><br><i>pluvialis</i> | Shannon<br>index<br>(H) |
|----------|------------------------------|--------------------------------|------------------------|--------------------------------|---------------------------------|-------------------------|
| Ngurunit | +                            | +                              | +                      | +                              | +                               | 1.3                     |
| Shurr    | +                            | +                              | +                      | -                              | +                               | 0.6                     |
| Nanyuki  | -                            | +                              | -                      | -                              | -                               | 0                       |

281 (+) indicates the specific biting fly was detected; (-) indicates not detected.

282

283 **3.2. *Trypanosoma* spp. identified in biting flies from the tsetse-free area detected using**  
284 **molecular technique**

285 **3.2.1. Trypanosomes in *H. camelina***

286 Out of the 150 *H. camelina* (Fig. 2A) flies analysed, 3% had detectable *T. congolense* savannah  
287 PCR amplicons (700 bp), 39% had *T. vivax* amplicons (250 bp), 9% had *Trypanozoon* amplicons  
288 (500 bp), 6% had mixed *T. vivax* and *Trypanozoon* DNA, 3% had mixed *T. congolense* and  
289 *Trypanozoon* DNA, and 1% had DNA of all three species (*T. congolense*, *Trypanozoon*, and *T.*  
290 *vivax*) (Fig. 3A & B). *Trypanosoma vivax* was more common compared to *Trypanozoon* ( $\chi^2 =$   
291 36.883, df = 1,  $P < 0.001$ ) and *Trypanozoon* was more common than *T. congolense* ( $\chi^2 = 4.771,$   
292  $P = 0.0289$ ). Occurrence of mixed DNA was low (Fig. 3A–B). Trypanosomes were detected  
293 using total DNA isolated from individual flies by PCR targeting the trypanosomal ITS1 gene  
294

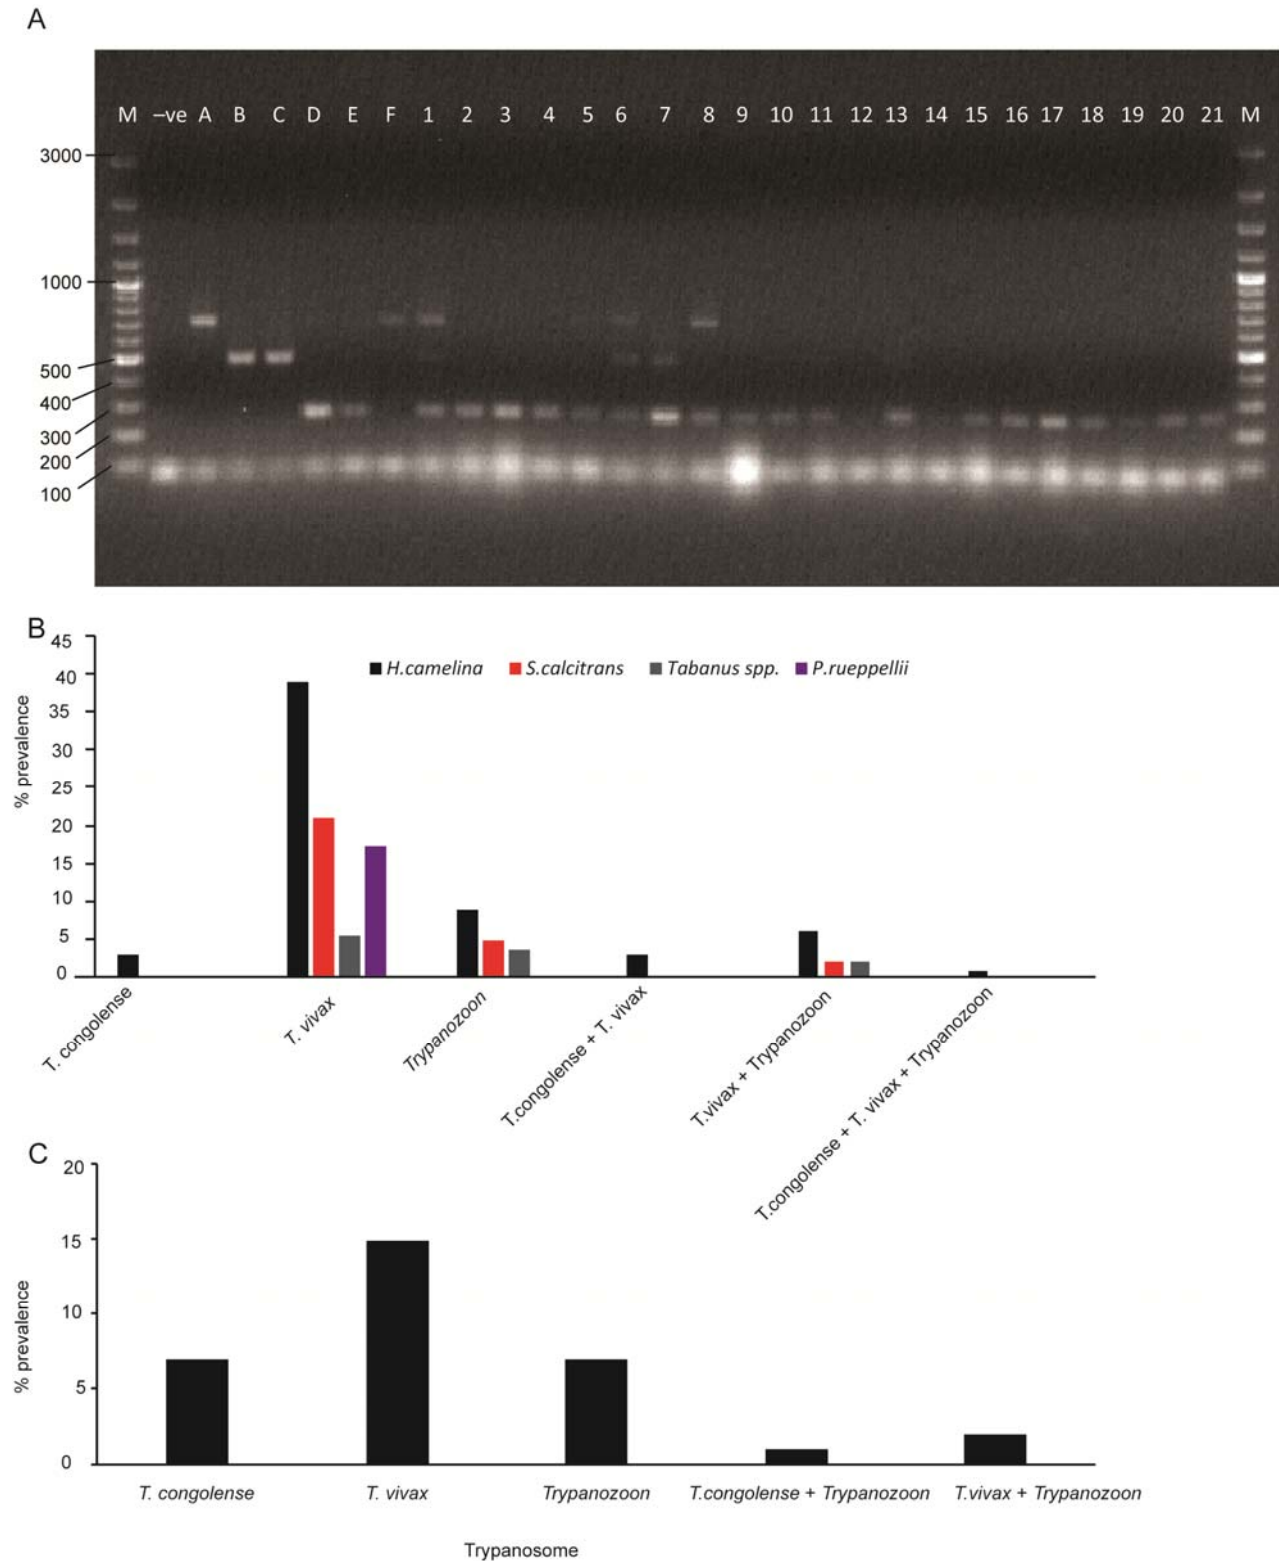

295

296

297 **Fig. 3. Prevalence and diversity of trypanosomes in biting flies.** (A) PCR products were  
298 resolved through 1% ethidium-bromide stained agarose gel at 80V for 1.5 hrs. Lane M 100-bp

299 marker (Thermo Scientific, USA); Lane ‘-ve’: negative control; Lane A – D contain positive  
300 controls for Lane A: *T. congolense* savannah (IL3000); Lane B: *T. brucei* ILTat 1.4; Lane C: *T.*  
301 *evansi* KETRI 2479; Lane D: *T. vivax* IL 2136; Lanes E and F: Trypanosome-infected camel  
302 blood from the same site as that of the flies; Lanes 1 – 21: some of selected *H. camelina* samples  
303 (B) The percentage prevalence of trypanosome species in biting flies. (C) The prevalence and  
304 diversity of trypanosomes detected from field collected *G. pallidipes* (n = 101).

### 305 **3.2.1.1 Diversity of trypanosomes in *H. camelina* from two sampling sites**

306 The prevalence of trypanosomes in *H. camelina* collected from two sampling sites in northern  
307 Kenya, namely Ngurunit and Shurr, was variable. Out of the 150 flies analysed (75 flies from  
308 each site), 33% of flies from Ngurunit carried *T. vivax* (25/75), *Trypanozoon* was detected in  
309 2.7% of flies (2/75), whereas about 5% of flies contained *T. congolense* savannah (4/75).  
310 However, 45% of *H. camelina* from Shurr were positive with *T. vivax* (34/75), whereas 14.7% of  
311 flies contained *Trypanozoon* (11/75). Thus, *H. camelina* collected from Shurr had significantly  
312 higher trypanosome-positive flies than those from Ngurunit ( $\chi^2 = 6.23$ ,  $P = 0.013$ ). However, *T.*  
313 *congolense* was not detected in flies sampled from Shurr flies. No *H. camelina* flies were found  
314 in Nanyuki (Table 1).

### 315 **3.2.2. Trypanosomes detected in *S. calcitrans***

316 Field-trapped *S. calcitrans* (n = 100), 50 from each of the two sampling sites in Marsabit (Fig.  
317 2B) were analysed for the presence of trypanosomes; one fly from Ngurunit and four flies from  
318 Shurr were positive for *Trypanozoon* in total (5%) and in 21 flies *T. vivax* DNA was detected,  
319 eight from Ngurunit and 13 from Shurr site, in total, in 21% of flies. Similarly, more *S.*  
320 *calcitrans* were positive with *T. vivax* as compared to *Trypanozoon* ( $P < 0.001$ ,  $\chi^2$  test).  
321 Approximately 2% of the *S. calcitrans* from Shurr were positive for mixed *Trypanozoon* and *T.*  
322 *vivax* DNA (Figs. 3B and 4).

323

324 **3.2.3. Trypanosomes detected in *Tabanus* spp.**

325 Field trapped *Tabanus* spp. (Fig. 2E and F) contained *T. vivax* DNA (5.4%; n = 50 flies) and  
 326 *Trypanozoon* (3.6%; n = 50 flies), trypanosomes DNA detected relatively lower in *Tabanus* spp.  
 327 than in *H. camelina* and *S. calcitrans* (Figs. 3B and 4), and no significant difference was  
 328 observed between the number of *T. vivax* and *Trypanozoon* DNA detected in the analysed  
 329 *Tabanus* spp. flies ( $\chi^2$ ,  $P > 0.05$ ).

330 **3.2.4. Trypanosomes detected in *P. rueppellii***

331 We also identified another potential trypanosome vector, *P. rueppellii* (Fig. 2C) with *T. vivax*  
 332 DNA in 17.4% of flies (n = 50), no other species of trypanosome was detected in *P. rueppellii*  
 333 (Figs. 3B and 4). However, no trypanosomes were identified in 50 *Hae. pluvialis*, Fig. 2D.  
 334 Among all biting flies analysed (except *Tabanus* spp.), *T. vivax* was the most abundant  
 335 trypanosome species, followed by *Trypanozoon* (Fig. 3B).

336

| Biting flies                                                                                                | <i>Trypanozoon</i> | <i>T. vivax</i> | <i>T. congolense</i> | Mixed DNA | Shannon diversity index | sample size |
|-------------------------------------------------------------------------------------------------------------|--------------------|-----------------|----------------------|-----------|-------------------------|-------------|
| <i>H. camelina</i><br>    | 9%                 | 39%             | 3%                   | 10%       | 1.1                     | 150         |
| <i>S. calcitrans</i><br> | 5%                 | 21%             | -                    | 2%        | 0.7                     | 100         |
| <i>P. rueppellii</i><br> | -                  | 17.4%           | -                    | -         | 0.0                     | 50          |
| <i>Tabanus</i> sp.<br>   | 3.6%               | 5.4%            | -                    | 2%        | 0.7                     | 50          |
| <i>H. pluvialis</i><br>  | -                  | -               | -                    | -         | 0.0                     | 50          |
| <i>G. pallidipes</i><br> | 7%                 | 15%             | 7%                   | 2%        | 1.4                     | 101         |

337

338 **Fig. 4. Diversity and percent of trypanosome species in biting flies.** (-) indicates negative for  
 339 that specific trypanosome species.



### 340 **3.2.5. Trypanosomes detected in *G. pallidipes***

341 The trypanosomes diversity and prevalence were compared with freshly field-trapped  
342 trypanosome biological vector, *G. pallidipes*, from Shimba Hills in coastal Kenya (Fig. 1A).  
343 From 101 field-trapped *G. pallidipes* analysed, DNA of various trypanosomes were detected in  
344 32%, 7.14% of which were *T. congolense* savannah (700 bp), 14.8% were *T. vivax* (250 bp), and  
345 6.9% were *Trypanozoon* (500 bp). However, no significant differences in prevalence were  
346 recorded for the three trypanosome species, namely *T. congolense*, *T. vivax*, and *Trypanozoon*  
347 (either *T. brucei* or *T. evansi*) ( $P = 0.08$ ). Similarly a low rates of mixed trypanosome DNA  
348 (*T. congolense* and *Trypanozoon*) in 1% and in 2 % of *G. pallidipes*. *T. vivax* and *Trypanozoon*  
349 detected (Fig. 3C). Our results show that diverse non-tsetse hematophagous biting flies from the  
350 tsetse-free area harbour similar trypanosomes detected in *G. pallidipes* (Fig. 3C). The diversity  
351 of trypanosomes indicated by Shannon Index H varies between the different biting flies, *H.*  
352 *camelina* and *G. pallidipes* harboured more diverse trypanosomes DNA (Figure 4).

353

### 354 **3.3. Trypanosome prevalence and diversity in camels**

#### 355 **3.3.1. Parasitological examination using light microscopy**

356 Direct thin blood smears from the jugular vein showed an active infection of *Trypanozoon* in 16  
357 camels ( $7.2 \pm 3.4\%$ , 95% confidence intervals) of the sampled camels ( $n = 222$ ). Trypanosomes  
358 were morphologically identified as belonging to *Trypanozoon* subgenus based on their  
359 morphology and motility. *T. vivax* is known to move fast but is less curved, whereas *T. brucei*  
360 moves fast but straight across a microscope field [21]. Trypanosome infections in camels varied  
361 in the parasite load from lowest parasitemia estimated at  $10^6$  to highest of  $5.10^8$   
362 trypanosomes/mL blood (Figs 5A–B).

363 For further confirmation of the morphological identification, molecular analysis of  
364 microscopically positive and negative samples was performed. Figure 5C combines selected  
365 samples that were microscopically positive and those that were negative microscopically.  
366 Morphologically, *Trypanozoon*-positive samples 25 (GenBank accession MH247163), 31  
367 (GenBank accession MH247168), 42 (GenBank accession MH247174), and 47 (GenBank  
368 accession MH247157) were also *Trypanozoon* positive by PCR and sequencing (Fig 5C) (for  
369 details, see section 3.3.2). In Fig 5C, six of the microscopically negative samples (26, 32, 37, 38,  
370 41, and 45) remained negative with PCR. However, 13 samples (27-30; 33, 34-36; 39, 40, 43, 44,

371 46) that were negative microscopically, were found to be *Trypanozoon* positive with PCR,  
372 showing the sensitivity of PCR technique. A clear difference was observed in those  
373 microscopically positive and negative samples, relatively sharp and intense PCR band in those  
374 samples that were microscopically positive as compared to those microscopically negative (Fig  
375 5C +). For further confirmation six microscopically *Trypanozoon* positive (GenBank accessions  
376 MH247157, MH247162, MH247163, MH247168, MH247170, and MH247174) and 10  
377 microscopically negative, but *Trypanozoon* positive by PCR (GenBank accession MH247155,  
378 MH247158, MH247159, MH247160, MH247161, MH247166, MH247167, MH247169,

379 MH247173 and MH247177) were sequenced (for details, see section 3.3.2).

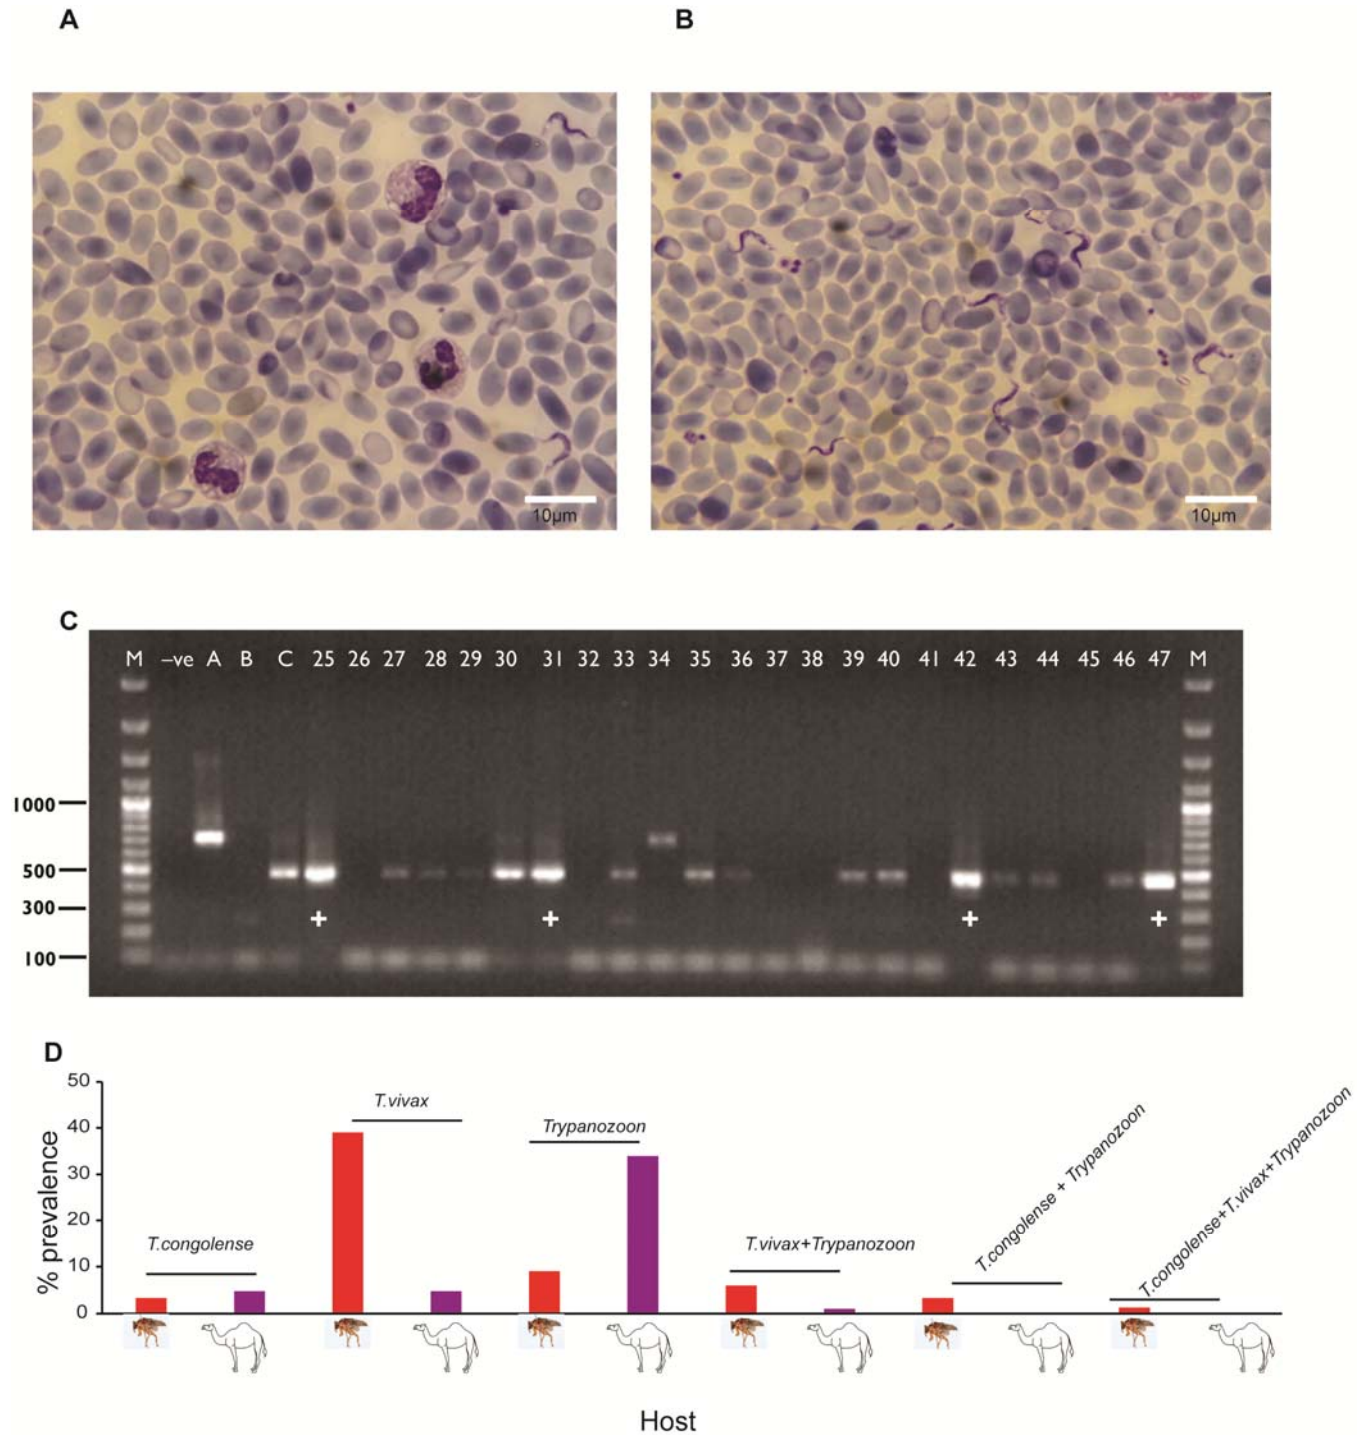

380

381 **Fig. 5. Detection of trypanosomes in camels and *H. camelina*.** (A - B) Representative light  
382 micrographs of Giemsa-stained camel blood sample smears from two different camels showing  
383 varying parasitemia (A) low and ( B) high parasitemia, *T. evansi* (GenBank accessions

384 MH247174) with a small sub terminal kinetoplast at the pointed posterior end, a long free  
385 flagellum and a well-developed undulating membrane. (C) Agarose gel electrophoresis (1.2 %)  
386 performed on ITS1 PCR amplicons. Lane M: 100 bp marker; Lane '-ve': negative control (non-  
387 template control); Lane A: *T. congolense* savannah IL3000; Lanes B: *T. vivax* IL2136; Lane C:  
388 *T. evansi* KETRI 2479; Lanes 25-47: selected camel blood samples, + shows camel that was  
389 trypanosome-positive by microscopy (D). Prevalence of trypanosome species in *H. camelina* and  
390 camels.

391

### 392 **3.3.2. PCR-based trypanosome detection in camels**

393 Trypanosomal ITS-1 PCR amplification showed 34% (75/222) of the camels were infected with  
394 *Trypanozoon*, which was more common than *T. vivax* infections (4.8%), with 250-bp PCR  
395 products ( $\chi^2 = 14.4$ ,  $P < 0.001$ ), and *T. congolense* savannah infections (4.8%), identified by 700-  
396 bp PCR amplicons. Mixed infections of *T. vivax* and *Trypanozoon* (*T. evansi* or/and *brucei*)  
397 accounted for 1.4% of the 222 camel samples analysed from the three sites. For further  
398 confirmation of size-based identification, we randomly selected 32 samples from PCR amplicons  
399 from each trypanosome species, those with good quality DNA and required concentration, for  
400 sequencing and those trypanosomes with known clinical symptoms. We sequenced 32 selected  
401 samples from all trypanosome species for further confirmation. The PCR amplicons of 32  
402 samples were successfully sequenced and obtained sequences that clustered with known *T. vivax*  
403 or *T. evansi* and *T. brucei* isolates (Fig. 6). Five camels (GenBank accessions MH247140,  
404 MH247142, MH247145, MH247147, MH247149) and two *H. camelina* (GenBank accession  
405 MH247150, MH247152) were infected with *T. vivax* (100% nucleotide identity to GenBank  
406 accession MK880189). Two camels, one *H. camelina*, and one *S. calcitrans* were infected with  
407 trypanosomes (GenBank accessions MH247172, MH247174, MH247175, MH247177) sharing  
408 >99% ITS-1 nucleotide sequence identity with *T. evansi* sequences. Twenty-four sequences  
409 (GenBank accessions MH247139, MH247141, MH247146, MH247148, MH247151,  
410 MH247153-MH247163, MH247165-MH247170, MH247173, MH247176) clustered with *T.*  
411 *brucei*, sharing 99.3% identity with *T. brucei* (GenBank accession X05682), but also < 98%  
412 identity with *T. evansi* reference sequences. Further attempts to amplify and sequence *T. brucei*-  
413 specific kinetoplast maxicircle sequences, which are absent in *T. evansi*, confirmed four of the  
414 samples, one from *G. pallidipes* and three camel samples, as harbouring *T. brucei* (GenBank

415 accessions MH247139, MH247159, MH247166, MH247167). We were unable to determine  
416 conclusively whether the other 17 samples with trypanosome ITS-1 sequences clustering among  
417 *T. brucei*, were *T. brucei* or *T. evansi* (Fig. 6).  
418 Further characterization of the samples using the *T. evansi* type A-specific primers differentiated  
419 the *T. evansi* in the *S. calcitrans* (GenBank accession MH247175) as *T. evansi* type A. Three of  
420 the camel samples with ITS-1 sequences (GenBank accessions MH247157; MH247160 and  
421 MH247169) that clustered among *T. brucei* also amplified using the *T. evansi* type A-specific  
422 primers, indicating either that *T. brucei* and *T. evansi* can share identical ITS-1 sequences or  
423 could be indicative of mixed infections with *T. brucei* and *T. evansi*. We failed to amplify *T.*  
424 *evansi* type B from *Trypanozoon* positive samples, though we cannot rule out the complete  
425 absence of Type B as we only analysed a subset of the samples.

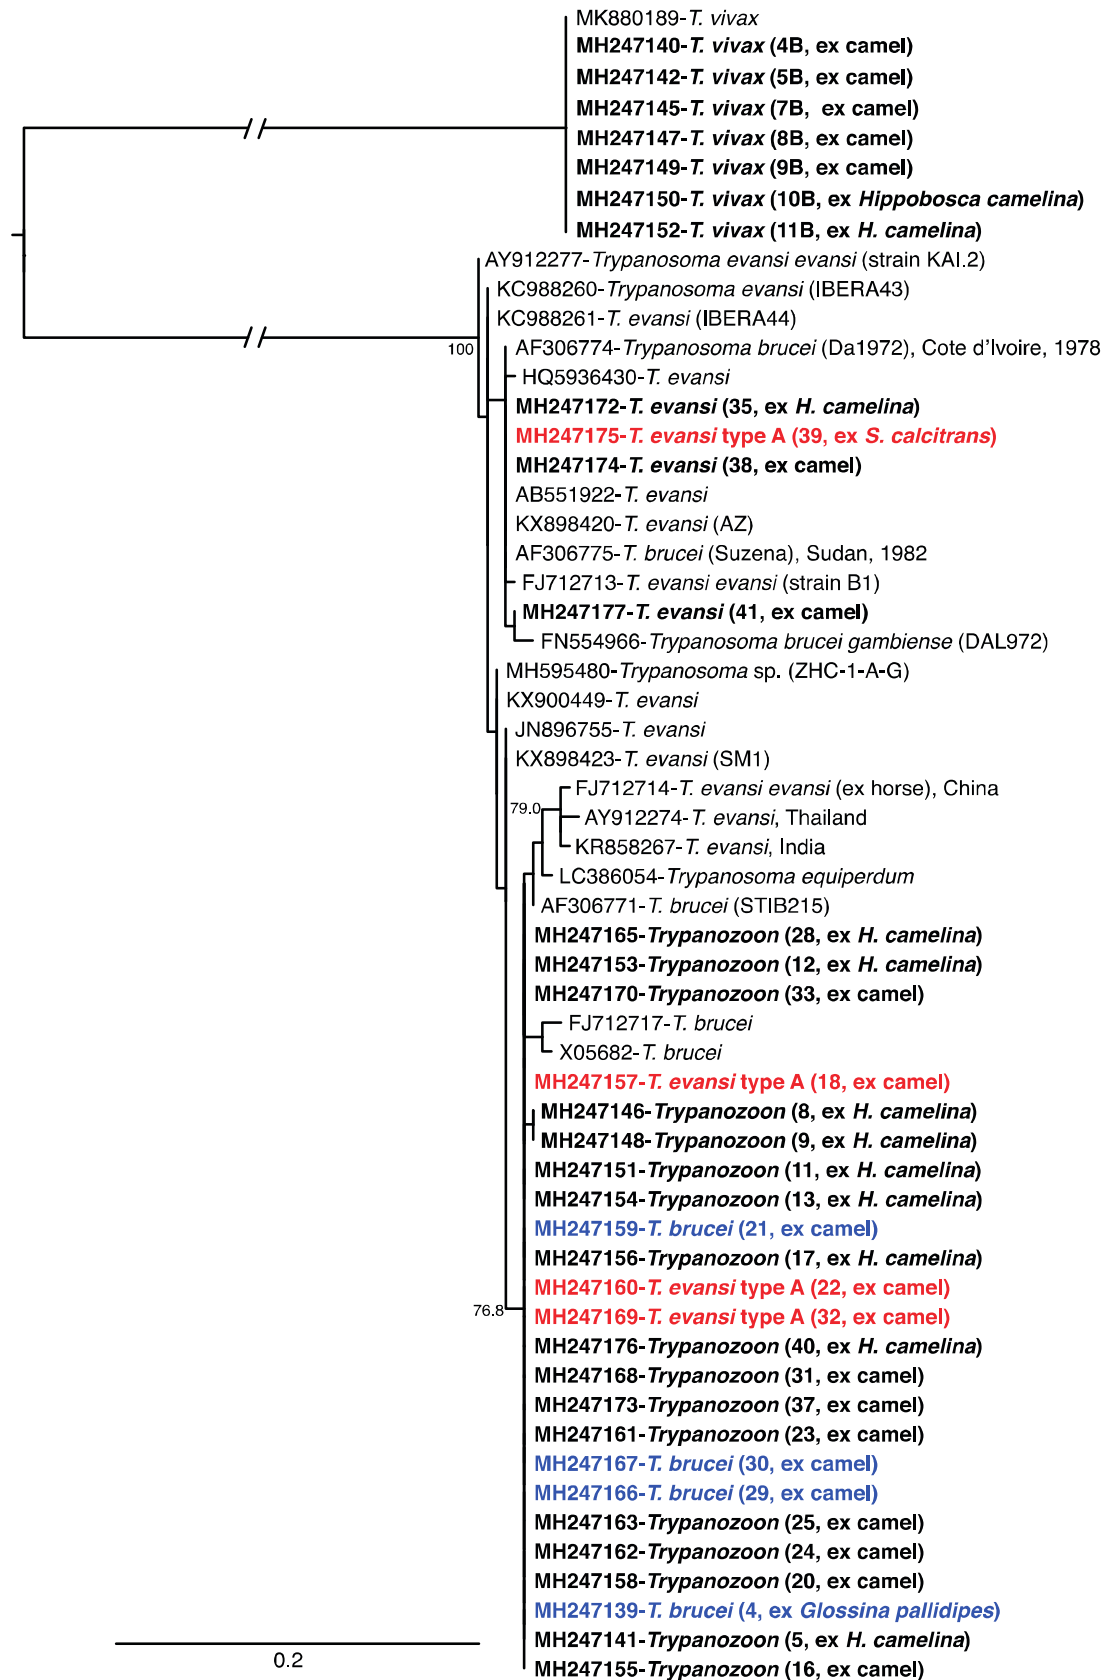

427 **Figure 6: Maximum likelihood phylogeny of trypanosome ITS-1 nucleotide sequences.**

428 GenBank accession numbers and isolation sources are indicated. Sequences from this study are  
429 indicated in bold; trypanosomes were isolated from *G. pallidipes*, *S. calcitrans*, *H. camelina*, and  
430 camels. Sequences associated with samples confirmed to harbour *T. evansi* type A by  
431 amplification of the VDG RoTat 1.2 gene are highlighted in red. Sequences associated with  
432 samples confirmed to harbour *T. brucei* by maxicircle kDNA amplification are highlighted in  
433 blue. Bootstrap values at the major nodes represent agreement among 1000 replicates. The  
434 branch length scale represents substitutions per site. Branch gaps in the mid-point root branches  
435 represent 2.7 substitutions per site.

436 **3.3.4 Anaemia associated with *Trypanozoon* infection**

437 To determine the association between *Trypanozoon*, active infection and PCV, a measure of  
438 anaemia, which is one of the consequences of trypanosome infection [20, 39] and a symptom of  
439 surra, we compared the mean PCVs between camels with active *Trypanozoon* infection and those  
440 that were negative by microscopy. *Trypanozoon* infection affected the PCV values significantly;  
441 camels that had active *Trypanozoon* infection were anaemic with the mean PCV value of  $24.64 \pm$   
442  $6$ ; however, microscopically negative camels had a higher PCV value of  $30.14 \pm 6$ ,  $t = 3.303$ ,  $P =$   
443  $0.002$ ,  $n = 222$ ).

444 **3.4. Diversity of trypanosomes in other domestic animals co-herded with camels**

445 We further analysed the prevalence of trypanosomes in other domestic animals such as goats,  
446 sheep, donkeys, and cattle that are co-herded with camels using PCR technique. *Trypanozoon*  
447 DNA was detected in small ruminants (goats and sheep), but not in cattle (Fig. 7). *Trypanosoma*  
448 *vivax* was more prevalent in sheep as compared to *Trypanozoon* ( $\chi^2 = 13.146$ ,  $P = 0.0003$ ,  $df =$   
449  $1$ ). In goats, *T. vivax* infections accounted for 8.2%, while the infection rate by *Trypanozoon* was  
450 10.2% showing no significant difference ( $\chi^2$ ,  $P > 0.05$ ). Cattle were infected with *T. vivax* (9.5%)  
451 and *T. congolense* (2.4%) with no significant difference (Fig. 7). Furthermore, *T. vivax* was  
452 detected in 14% of donkeys, but no other trypanosomes species were detected (Fig. 7). However,  
453 all these livestock were negative microscopically.

454

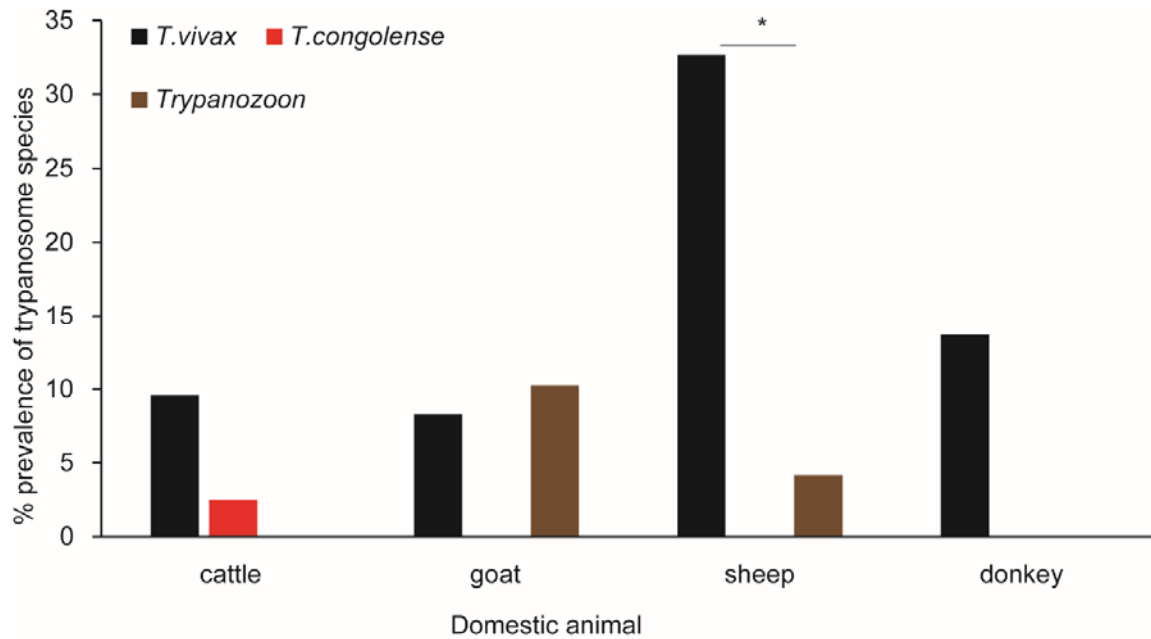

455  
456 **Fig. 7. Prevalence and diversity of trypanosomes in domestic animals co-herded with**  
457 **camels.** Percent prevalence of the three trypanosomes species in four domestic animals that co-  
458 herded with camels based on PCR. Significant difference in prevalence between trypanosomes  
459 species are depicted by an asterisk. An equal number of blood samples were collected from  
460 Ngurunit and Shurr for cattle, goats, and sheep, while donkeys were exclusively sampled from  
461 Shurr.

462

### 463 **3.5. Identification of vertebrate hosts from bloodmeal analysis of *H. camelina* and *S.*** 464 ***calcitrans***

#### 465 **3.5.1. Proportion of blood-meals taken by *H. camelina* from different hosts**

466 The majority of *H. camelina* collected using traps had fed on domestic animals (95%,  $\chi^2 =$ ,  $P <$   
467 0.0001). The camel host was the primary source of bloodmeals for 60% of the fed flies ( $\chi^2 =$   
468 7.96,  $P = 0.005$ ), followed by goats (15%), sheep (14 %), and rats (4%) (Fig. 8A–B). Some of  
469 the flies fed on multiple vertebrate hosts; for instance, 1% of *H. camelina* fed on both human and  
470 sheep, 3% on camel and sheep, and 3% on goats and sheep. Each household kept diverse  
471 domestic animals (Fig. 8D). Sheep and goats were the most abundant, followed by camels, and  
472 relatively few cattle. The relative feeding index of *H. camelina* was calculated according to  
473 [37][38] as follow  $W_i = O_i/P_i$ , where,  $W_i$  = feeding ratio for livestock  $i$ ,  $O_i$  = percentage of  
474 livestock  $i$ , in the blood meals,  $P_i$  = proportion or percentage of species  $i$  available in the



475 environment. We calculated the relative feeding preference of *H. camelina* to camel against  
476 sheep, the most abundant livestock per household in Shurr. The average camel population per  
477 household was 35, while the average sheep population per household was 223. The camel: sheep  
478 abundance ratio was  $35/223 = 0.157$ . 60% of *H. camelina* fed on camels, 15% fed on sheep, thus  
479 the observed feeding rate was  $60/15 = 4$ . Therefore, the feeding index was 25.5 ( $4/0.157$ ) as  
480 obtained from blood meal analysis of *H. camelina* shows a higher feeding preference on camels  
481 than sheep.

482

### 483 **3.5.2. Proportion of blood meals taken by *S. calitrans* from vertebrate hosts**

484 The bloodmeals of *S. calitrans* included mainly cattle, camels, buffaloes, and goats (Fig. 8C).

485 The relative feeding index of *S. calitrans* was calculated using the formula  $W_i = O_i/P_i$  described  
486 earlier in section 3.5.1. About 15% of *S. calitrans* fed on camel, 7% flies fed on sheep, observed  
487 feeding ratio  $15/7 = 2$ . Therefore, the feeding index of 12.7 ( $2/0.157$ ) as obtained from blood  
488 meal analysis of *S. calitrans* shows higher feeding preference to camel rather than sheep.

489 However, *S. calitrans* preferred to feed on cattle than camel. The camel: cattle abundance ratio  
490 was: 5 ( $35/7$ ), and, the ratio of the number of feeds by *S. calitrans* on camel and cattle, 0.428  
491 ( $15/35$ ). Thus, the feeding index for camel was  $0.428/5 = 0.09$ , showing the high preference to  
492 feed on cattle than camel.

493

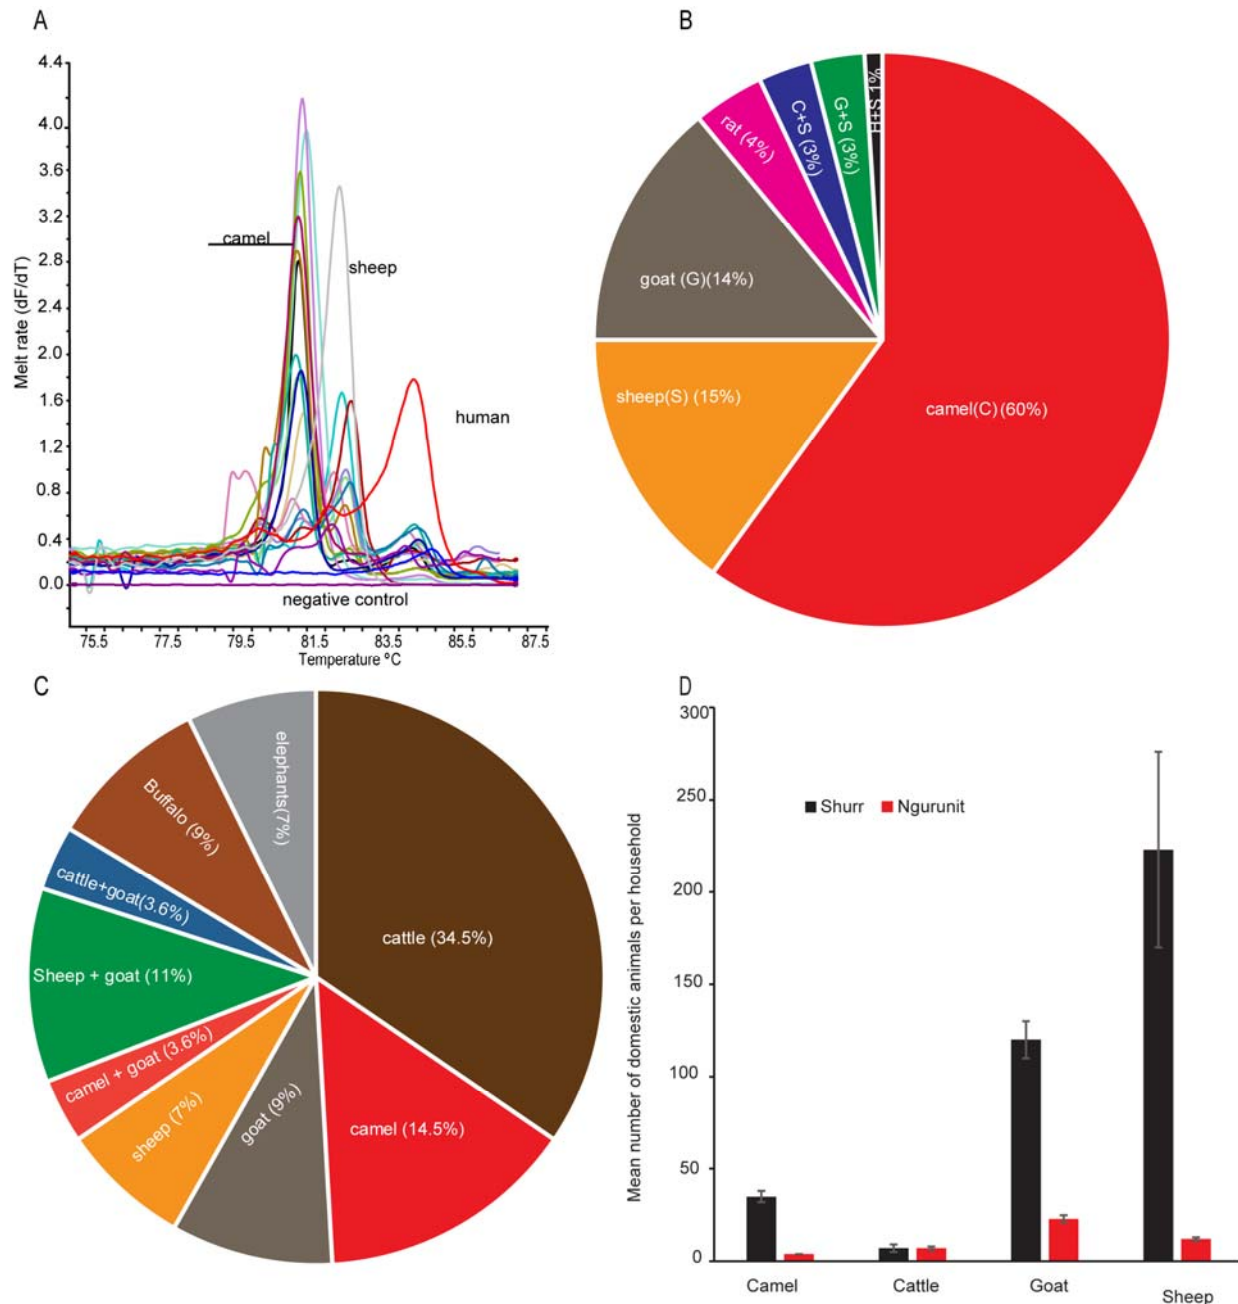

494

495 **Fig. 8. Bloodmeal analysis in *H. camelina* and *S. calcitrans* to determine vertebrate hosts.**

496 **(A)** Representative HRM profiles of selected *H. camelina* bloodmeal sources analyzed using 16S

497 rRNA gene target. Positive controls were included for comparison. **(B)** Percent of bloodmeals for

498 *H. camelina* identified using the 16S rRNA primer (n = 100). **(C)** Percent of blood meals from

499 various vertebrate in *S. calcitrans* identified using 16S rRNA primer (n = 40). **(D)** Diversity and

500 abundance of domestic animals in Shurr and Ngurunit. Error bar indicates standard error, n = 96

501 and 92 households from Shurr and Ngurunit, respectively.

#### 502 4. Discussion

503 Animal trypanosomosis is caused by several trypanosome species of genus *Trypanosoma* that are  
504 transmitted cyclically by tsetse flies and mechanically by other hematophagous flies. Since there  
505 were no tsetse flies in the study sites, other blood-sucking insects identified, such as *H. camelina*  
506 and stable flies, could serve as mechanical vectors that maintain trypanosomes in circulation  
507 among livestock. One of the factors that influences the mechanical transmission of trypanosomes  
508 by biting flies is the survival of the pathogen in the proboscis and midgut. Previous reports  
509 indicate that *T. evansi* can survive in the midgut of *H. camelina* for 75–90 minutes [15]. With our  
510 parasite establishment experiment *T. congolense* survived for 3 hrs and trypanozoon for 5 hr in  
511 the mid gut of *S. calcitrans*. Similarly, Sumba et al., 1998 [40] demonstrated that *T. congolense*  
512 survived for 3 and half hours and *T. evansi* for 8 hours in the gut of *Stomoxys niger* and *S.*  
513 *taeniatus*, showing their might be vectoral competence variation between *Stomoxys* species that  
514 need to be investigated. To determine how long it takes for *H. camelina* to find the next camel  
515 host when it is interrupted from feeding, we studied its mobility using a mark–release–recapture  
516 method by displacing them from the hosts. These flies were able to re-locate camels in ~60  
517 minutes when translocated up to 1.5 Km away, which is within the time range of the parasite  
518 survival (SF2). Similarly, various *Stomoxys species*, which can transmit the pathogen at different  
519 time intervals and have long-distance mobility [13, 41].

520 The high number of *H. camelina* and *S. calcitrans*, their occurrence throughout the year,  
521 and the diversity of trypanosomes detected makes these two biting flies the most important  
522 potential vectors of trypanosome in tsetse-free ecologies. Furthermore, these two biting flies fed  
523 preferably on camels, but also on other hosts such as cattle and goats. However, the role of other  
524 biting flies identified, such as *Tabanus* spp. and *Pangonia* spp., should not be underestimated  
525 [13, 40, 42, 43]. These biting flies harbour similar trypanosome species as *G. pallidipes*, one of  
526 the major tsetse species in sub-Saharan Africa, due to its wider geographical distribution and  
527 economic importance [44–46]. The detection of diverse trypanosomes in non-tsetse infested  
528 areas shows that trypanosome diversity is conserved across a broader biogeography that includes  
529 tsetse-free regions.

530 The low percentage of the camels identified with active infection might be due to the low  
531 sensitivity of the microscopic technique [39, 47]. However, the molecular data showed that a  
532 significant number of camels were infected by trypanosomes, indicating that they might have

533 subclinical infections. Thus, there is a possibility that sub-clinically infected camels can serve as  
534 a reservoir of trypanosomes. We also documented infected camels presenting with high  
535 parasitemia (Fig. 5B GenBank accession MH247157), which is required for mechanical  
536 transmission by biting flies [48]. Another reason for not detecting trypanosomes in blood might  
537 be due to trypanosomes moving to other tissues; for example, the skin is an anatomical reservoir  
538 of parasites of arthropod-borne diseases, such as trypanosomes [49]. Thus, we checked the  
539 lymph node aspirate (LNA) from a few sick camels with clear clinical signs of trypanosomosis,  
540 but with negative results during blood examination. We found that camel blood samples could  
541 test negative for trypanosome infection through microscopy and PCR but be positive in LNA  
542 (SF3 A-B). This finding agrees with previous reports that showed the presence of trypanosomes  
543 in LNA, but absence in the blood of cattle and sheep [50].

544 Camels that showed active infection microscopically were anaemic with average PCVs  
545 below 25, as compared to those microscopically negative camels with an average PCV of 30.  
546 With regards to different clinical outcomes, we have seen severely anaemic haemorrhagic camels  
547 that were infected by *T. vivax* (GenBank accessions MH247149) (PCV 9%) or by *T. evansi* type  
548 A (GenBank accessions MH247169) (PCV 11%). However, other camels with high *T. evansi*  
549 parasitaemia (millions of trypanosomes/mL of blood) were feeding well and in good body  
550 condition (PCV 21%) (GenBank accessions MH247174), which indicates that there could be  
551 different *T. evansi* populations as reflected in varying degrees of virulence to camels, that need  
552 further investigation. However, virulence also depends on the immune status of the host, past and  
553 recent infection by complex pathogens, as well as the genetic makeup of individual hosts.  
554 Similarly, *T. vivax*-infected camels with as low as 9% PCV have been reported previously[39]

555 We sequenced the trypanosome ITS-1 gene, which is the preferred target for species-  
556 specific molecular diagnostics of trypanosomes [23, 47]. The ITS-1 sequences produced distinct  
557 clusters for *T. vivax*, and *Trypanozoon* (Fig. 6). *Trypanosoma vivax* was the most prevalent  
558 trypanosome followed by *Trypanozoon*, both in flies and domestic animals, but not in camels, in  
559 which *Trypanozoon* was most common. We further detected maxicircle kDNA [25] in our  
560 *Trypanozoon* samples, confirming the presence of *T. brucei* in *G. pallidipes* and three camel  
561 samples. Additionally, we characterized *T. evansi* type A by the presence of the type A-specific  
562 marker targeting the RoTat 1.2 VSG gene, but we failed to detect *T. evansi* type B. The absence  
563 of *T. evansi* type B could be due to diagnostic limitations or the small sample size analysed, but

564 these findings are congruent with previous findings of low occurrence of the *T. evansi* B subtype  
565 in camels [27, 28, 51]. However, for 20 of the *Trypanozoon* ITS-1 sequences obtained, we were  
566 not able to determine conclusively whether they were of *T. brucei* or *T. evansi*, showing that the  
567 ITS-1 gene cannot be used to effectively differentiate between these species. This challenge of  
568 *Trypanozoon* subgenus identification and the need for more specific and sensitive diagnostics is  
569 discussed by [52].

570 The detection of *T. brucei* and *T. congolense* both in biting flies and camel in the tsetse-free  
571 areas of northern Kenya might suggest the long-distance travelling of camels and other domestic  
572 animals between tsetse-free and the tsetse-infested areas, as some of the neighbouring counties  
573 are infested with tsetse flies. Similarly, previous studies detected *T. brucei* from camel in tsetse  
574 free area in northern Kenya [53][54]. To support this claim, a study done in North Eastern Kenya  
575 showed that animals move more than 120 Km from their homestead for better pasture and water,  
576 and infection of Rift Valley fever increases in herds that move than in those that remain at the  
577 homestead [55]. The other possibility is the presence of unidentified biological vectors, which  
578 will require further investigation, combined with vectorial capacity study of the identified biting  
579 flies and population genetics of trypanosomes.

## 580 **5. Conclusions**

581 The detection of diverse trypanosomes species/strains both in various biting flies and in camels  
582 suggests that trypanosomosis in camels is not only due to surra (*T. evansi* infection), but also  
583 nagana (*T. brucei*, *T. congolense*, and *T. vivax* infections). Such knowledge helps in drug  
584 administration because one could tailor the treatment to each trypanosome species [56].  
585 Furthermore, our analysis shows that other domestic animals could serve as a reservoir of  
586 different trypanosomes, such as *T. vivax* and *T. congolense*, which are more deadly to camels [5,  
587 9, 57]. Finally, the similarity of pathogens found in biting flies and their domestic animal blood-  
588 meal hosts demonstrates that these hematophagous flies could be used for xenomonitoring to  
589 track trypanosomes circulating in domestic animals as an early detection method.

## 590 **List of abbreviations**

591 HRM: High-resolution melting; *icipe*: International Centre of Insect Physiology and Ecology;  
592 ITS1: Intergenic transcribed spacer gene 1; LNA: Lymph node aspirate; PCV: Packed Cell  
593 Volume; PCR: Polymerase chain reaction

594 **Declarations**

595 **Acknowledgements**

596 We thank Dr Robert Copeland for helping to identify the biting flies and taking the biting flies  
597 photo; Tiberius Marete, David Mbuvi, Peter Muasa and Irene Onyango for technical help;  
598 Kimathi, Emily and Barbara Kagima, for the study site map; Kelvin Muteru for his help in the  
599 bioinformatics; James Kabii for his technical help in the molecular studies, Collins Kigen,  
600 JohnMark, and Tawich K. Simon for technical help in the parasite survival experiments in *S.*  
601 *calcitrans* and Caroline Muya for handling the administrative issues. Special thanks go to Daud  
602 Tamasot (MCA), Malkash Lolkitarakino and Huka Guyo Qutte, Hussein Haji Abdulahi who  
603 facilitated our research at Shurr, Nanyuki and Ngurunit area. We thank Dr Mario Younan for his  
604 valuable technical advice on camels. We are grateful for the camel owners of Ngurunit, Nanyuki,  
605 and Shurr for their cooperation.

606 **Funding**

607 This work was supported mainly by the IBCARP camel, grant no. DCI-FOOD/2014/ 346-739 -  
608 by the European Union and funding from MPI-*icipe* partner group. We also gratefully  
609 acknowledge the financial support for this research by the following organisations and agencies:  
610 Swedish International Development Cooperation Agency (Sida); UK Department for  
611 International Development (DFID); the Swiss Agency for Development and Cooperation (SDC);  
612 Federal Democratic Republic of Ethiopia; and the Kenyan Government. *The views expressed*  
613 *herein do not necessarily reflect the official opinion of the donors.* Joel Bargul is supported by  
614 DELTAS Africa Initiative grant # DEL-15-011 to THRiVE-2. The DELTAS Africa Initiative is  
615 an independent funding scheme of the African Academy of Sciences (AAS)'s Alliance for  
616 Accelerating Excellence in Science in Africa (AESA) and supported by the New Partnership for  
617 Africa's Development Planning and Coordinating Agency (NEPAD Agency) with funding from  
618 the Wellcome Trust grant # 107742/Z/15/Z and the UK government. The views expressed in this  
619 publication are those of the author(s) and not necessarily those of AAS, NEPAD Agency,  
620 Wellcome Trust or the UK government.

621

622 **Availability of data and materials**

623 All data generated or analysed in this study are included in the article and as additional files. The  
624 newly generated sequences were deposited in the NCBI Nucleotide database under the accession  
625 numbers listed in Supplementary table.

626 **Authors' contributions**

627 MNG, BT, DM, SR conceptualized and designed the experiments. MNG, JLB, AO, POA, JN,  
628 JMM generated experimental data, JV contributed in the molecular part of the study MNG  
629 analysed the data and wrote the manuscript. All authors reviewed, edited and approved the final  
630 manuscript.

631 **Competing interests**

632 The authors declare that they have no competing interests  
633

634 **Ethics approval and consent to participate**

635 We collected blood samples within the framework of epidemiological surveillance activities, in  
636 accordance to the International Centre of Insect Physiology and Ecology's Institutional Animal  
637 Care and Use Committee (IACUC) guidelines as performed during prophylaxis or diagnostic  
638 campaigns. Local authorities did not require ethical statements for the research studies. We did  
639 the blood sampling of domestic animals with the authorisation of the owner. Herdsmen/women  
640 gave their consent for their animal sampling after explaining the objectives of the study. No  
641 samples other than those for routine screening and diagnostic procedures were collected. All  
642 animals sampled and found positive with trypanosomes were treated using trypanocides.

643

644 **Consent for publication**

645 Not applicable.  
646

647 **References**

- 648 1. Aregawi WG, Agga GE, Abdi RD, Büscher P. Systematic review and meta-analysis on the  
649 global distribution, host range, and prevalence of *Trypanosoma evansi*. *Parasit Vectors*.  
650 2019;12:67.  
651 2. Hoare CA. The trypanosomes of mammals. *J small Anim Pr*. 1972;13:671–2.

- 652 3. Auty HK, Torr SJ, Michoel T, Jayaraman S, Morrison LJ. Cattle trypanosomosis: the diversity  
653 of trypanosomes and implications for disease epidemiology and control. *Rev Sci Tech Off Int*  
654 *Epiz.* 2015;34:587–98.
- 655 4. Desquesnes M, Dargantes A, Lai DH, Lun ZR, Holzmuller P, Jittapalapong S. *Trypanosoma*  
656 *evansi* and surra: A review and perspectives on transmission, epidemiology and control, impact,  
657 and zoonotic aspects. *Biomed Res Int.* 2013;2013.
- 658 5. Kamidi CM, Saarman NP, Dion K, Mireji PO, Ouma C, Murilla G, et al. Multiple  
659 evolutionary origins of *Trypanosoma evansi* in Kenya. *PLoS Negl Trop Dis.* 2017;11:1–21.
- 660 6. Joshi PP, Shegokar VR, Powar RM, Herder S, Katti R, Harsha R S, et al. Human  
661 trypanosomiasis caused by *Trypanosoma evansi* in India: the first case report. *Am J Trop Med*  
662 *Hyg.* 2005;73:491–5.
- 663 7. Shah I, Ali US, Andankar P, Joshi RR. Trypanosomiasis in an infant from india. *J Vector*  
664 *Borne Dis.* 2011;48:122–3.
- 665 8. Misra, K.K., Ghosh M and, Choudhury A. Experimental Transmission of *Trypanosoma*  
666 *evansi* to Chicken. *Acta Potozoologica.* 1976;30:381–6.
- 667 9. Kamidi CM, Auma J, Mireji PO, Ndungu K, Bateta R, Kurgat R, et al. Differential virulence  
668 of camel *Trypanosoma evansi* isolates in mice. *Parasitology.* 2018;145:1235–42.
- 669 10. Njiru ZK, Constantine CC, Ndung'u JM, Robertson I, Okaye S, Thompson RCA, et al.  
670 Detection of *Trypanosoma evansi* in camels using PCR and CATT/T. *evansi* tests in Kenya. *Vet*  
671 *Parasitol.* 2004;124:187–99.
- 672 11. Kassa T, Eguale T, Chaka H. Prevalence of camel trypanosomosis and its vectors in Fentale  
673 district, South East Shoa Zone, Ethiopia. *Vet Arh.* 2011;81:611–21.
- 674 12. Jittapalapong S, Pinyopanuwat N, Inpankaew T, Sangvaranond A, Phasuk C, Chimnoi W, et  
675 al. Prevalence of *Trypanosoma evansi* infection causing abortion in dairy cows in central  
676 Thailand. *Kasetsart J - Nat Sci.* 2009;43:53–7.
- 677 13. Desquesnes M, Dia ML. Mechanical transmission of *Trypanosoma congolense* in cattle by  
678 the African tabanid *Atylotus agrestis*. *Exp Parasitol.* 2003;105:226–31.
- 679 14. Gardiner PR. Recent Studies of the Biology of *Trypanosoma vivax*. *Adv Parasitol.*  
680 1989;Volume 28:229–317.
- 681 15. Oyieke, F. A., Reid G. The Mechanical transmission of *Trypanosoma evansi* by *Haematobia*  
682 *minuta* ( *Diptera* □: *Muscidae* ) and the survival of Trypanosomes in fly mouthparts parts and gut



- 683 (A Preliminary Record). *Folia Vet.* 2003;47:38–41.
- 684 16. Corman VM, Jores J, Meyer B, Younan M, Liljander A, Said MY, et al. Antibodies against  
685 MERS coronavirus in dromedary camels, Kenya, 1992–2013. *Emerg Infect Dis.* 2014;20:1319–  
686 22.
- 687 17. Laveissière C Grébaud P. The trapping of tsetse flies (Diptera: Glossinidae). Improvement of  
688 a model: the Vavoua trap]. *Trop Med Parasitol.* 1990;41(2), 185.
- 689 18. Kirk\_Spriggs, A.H and Sinclair B., editor. Kirk\_Spriggs, A.H and Sinclair, B.J. (Eds). 2017.  
690 Manual of Afrotropical Diptera. Volume 2. (Nematocera and Lower Brachycera). SANBI  
691 Publishing. Pp:XII, 935. Volume 2. SANBI Publishing.
- 692 19. Mullens BA, Lii K, Mao Y, Meyer JA, Peterson NG. Behavioural responses of dairy cattle to  
693 the stable fly , *Stomoxys calcitrans* , in an open field environment. *Med Vet Entomol.*  
694 2006;20:122–37.
- 695 20. Murray M, Murray PK, McIntyre WIM. An improved parasitological technique for the  
696 diagnosis of african trypanosomiasis. *Trans R Soc Trop Med Hyg.* 1977;71:325–6.
- 697 21. Bargul JL, Jung J, McOdimba FA, Omogo CO, Adung’a VO, Krüger T, et al. Species-  
698 Specific Adaptations of Trypanosome Morphology and Motility to the Mammalian Host. *PLoS*  
699 *Pathog.* 2016;12:1–29.
- 700 22. Daniel K. Masiga, Audra J. Smyth, Paul Hayes TJB and WCG. Sensitive detection of  
701 trypanosomes in tsetse flies by DNA amplification. *Int J Parasitol.* 1992;22:909–18.
- 702 23. Desquesnes M, McLaughlin G, Zoungrana A DA. Detection and identification of  
703 *Trypanosoma* of African livestock through a single PCR based on internal transcribed spacer 1 of  
704 rDNA. *Int J Parasitol.* 2001;31:610–4.
- 705 24. Njiru ZK, Constantine CC, Guya S, Crowther J, Kiragu JM, Thompson RCA, et al. The use  
706 of ITS1 rDNA PCR in detecting pathogenic African trypanosomes. *Parasitol Res.* 2005;95:186–  
707 92.
- 708 25. Masiga DK, Ndung’u K, Tweedie A, Tait A, Turner CMR. *Trypanosoma evansi*: Genetic  
709 variability detected using amplified restriction fragment length polymorphism (AFLP) and  
710 random amplified polymorphic DNA (RAPD) analysis of Kenyan isolates. *Exp Parasitol.*  
711 2006;114:147–53.
- 712 26. Balmer O, Beadell JS, Gibson W, Caccone A. Phylogeography and taxonomy of  
713 *Trypanosoma brucei*. *PLoS Negl Trop Dis.* 2011;5.

- 714 27. Birhanu H, Gebrehiwot T, Goddeeris BM, Büscher P, Van Reet N. New *Trypanosoma evansi*  
715 Type B Isolates from Ethiopian Dromedary Camels. *PLoS Negl Trop Dis*. 2016;10:1–22.
- 716 28. Ngaira JM, Olembo NK, Njagi ENM, Ngeranwa JJN. The detection of non-RoTat 1.2  
717 *Trypanosoma evansi*. *Exp Parasitol*. 2005;1. Oyieke,;30–8.
- 718 29. Kearse M, Moir R, Wilson A, Stones-Havas S, Cheung M, Sturrock S, et al. Geneious Basic:  
719 An integrated and extendable desktop software platform for the organization and analysis of  
720 sequence data. *Bioinformatics*. 2012;28:1647–9.
- 721 30. Guindon S, Dufayard JF, Lefort V, Anisimova M, Hordijk W, Gascuel O. New algorithms  
722 and methods to estimate maximum-likelihood phylogenies: Assessing the performance of  
723 PhyML 3.0. *Syst Biol*. 2010;59:307–21.
- 724 31. Lefort V, Longueville JE, Gascuel O. SMS: Smart Model Selection in PhyML. *Mol Biol*  
725 *Evol*. 2017;34:2422–4.
- 726 32. Drummond AJ, Rambaut A. BEAST: Bayesian evolutionary analysis by sampling trees.  
727 *BMC Evol Biol*. 2007;7:1–8.
- 728 33. Omondi D, Masiga DK, Ajamma YU, Fielding BC, Njoroge L, Villinger J. Unraveling host-  
729 vector-arbovirus interactions by two-gene high resolution melting mosquito bloodmeal analysis  
730 in a Kenyan wildlife-livestock interface. *PLoS One*. 2015;10.
- 731 34. Peña VH, Fernández GJ, Gómez-Palacio AM, Mejía-Jaramillo AM, Cantillo O, Triana-  
732 Chávez O. High-resolution melting (HRM) of the cytochrome B gene: A powerful approach to  
733 identify blood-meal sources in Chagas disease vectors. *PLoS Negl Trop Dis*. 2012;6.
- 734 35. Cameron AR, Baldock FC. A new probability formula for surveys to substantiate freedom  
735 from disease. *Prev Vet Med*. 1998;34:1–17.
- 736 36. Hammer Ø, Harper DAT, Ryan PD. Past: Paleontological statistics software package for  
737 education and data analysis. *Palaeontol Electron*. 2001;4:1–9.
- 738 37. Russell TL, Beebe NW, Bugoro H, Apairamo A, Cooper RD, Collins FH, et al. Determinants  
739 of host feeding success by *Anopheles farauti*. *Malar J*. 2016;15:1–9.
- 740 38. Kay BH, Boreham PFL, Williams GM. Host preferences and feeding patterns of mosquitoes  
741 (Diptera: Culicidae) at Kowanyama, Cape York Peninsula, northern Queensland. *Bull Entomol*  
742 *Res*. 1979;69:441–57.
- 743 39. Mossaad E, Salim B, Suganuma K, Musinguzi P, Hassan MA, Elamin EA, et al.  
744 *Trypanosoma vivax* is the second leading cause of camel trypanosomosis in Sudan after

- 745 *Trypanosoma evansi*. *Parasites and Vectors*. 2017;10:1–10.
- 746 40. Sumba AL, Mihok S, Oyieke FA. Mechanical transmission of *Trypanosoma evansi* and *T.*  
747 *congolense* by *Stomoxys niger* and *S. taeniatus* in a laboratory mouse model. *Med Vet Entomol.*  
748 1998;12:417–22.
- 749 41. Foil LD, Hogsette J a. Biology and control of tabanids, stable flies and horn flies. *Rev Sci*  
750 *Tech.* 1994;13:1125–58.
- 751 42. Votýpka J, Rádrová J, Skalický T, Jirků M, Jirsová D, Mihalca AD, et al. A tsetse and  
752 tabanid fly survey of African great apes habitats reveals the presence of a novel trypanosome  
753 lineage but the absence of *Trypanosoma brucei*. *Int J Parasitol.* 2015;45:741–8.
- 754 43. Taioe MO, Motloang MY, Namangala B, Chota A, Molefe NI, Musinguzi SP, Suganuma K,  
755 Hayes, P, Tsiol T, Chainey, J, Inoue, N and Thekiso O. Characterization of tabanid flies  
756 (Diptera: Tabanidae) in South Africa and Zambia and detection of protozoan parasites they are  
757 harbouring. *Parasitology.* 2017;;1–17.
- 758 44. Njiru ZK, Makumi JN, Okoth S, Ndungu JM, Gibson WC. Identification of trypanosomes in  
759 *Glossina pallidipes* and *G. longipennis* in Kenya. *Infect Genet Evol.* 2004;4:29–35.
- 760 45. Getahun MN, Cecchi G, Seyoum E. Population studies of *Glossina pallidipes* in Ethiopia:  
761 Emphasis on cuticular hydrocarbons and wing morphometric analysis. *Acta Trop.* 2014;138:12–  
762 21.
- 763 46. Saini RK, Orindi BO, Mbahin N, Andoke JA, Muasa PN, Mbuvi DM, et al. Protecting cows  
764 in small holder farms in East Africa from tsetse flies by mimicking the odor profile of a non-host  
765 bovid. *PLoS Negl Trop Dis.* 2017;11:1–27.
- 766 47. Njiru ZK, Constantine CC, Guya S, Crowther J, Kiragu JM, Thompson RCA, et al. The use  
767 of ITS1 rDNA PCR in detecting pathogenic African trypanosomes. *Parasitol Res.* 2005;95:186–  
768 92.
- 769 48. Toukam CM., Solano P, Bengaly Z, Jamonneau V, Bucheton B. Experimental evaluation of  
770 xenodiagnosis to detect trypanosomes at low parasitaemia levels in infected hosts. *Parasite.*  
771 2011;18:295–302.
- 772 49. Capewell P, Cren-Travaillé C, Marchesi F, Johnston P, Clucas C, Benson RA, et al. The skin  
773 is a significant but overlooked anatomical reservoir for vector-borne African trypanosomes.  
774 *Elife.* 2016;5:3–5.
- 775 50. Luckins AG, Gray AR. Trypanosomes in the lymph nodes of cattle and sheep infected with

- 776 *Trypanosoma congolense*. Res Vet Sci. 1979.
- 777 51. Borst P, Fase-Fowler F, Gibson WC. Kinetoplast DNA of *Trypanosoma evansi*. Mol  
778 Biochem Parasitol. 1987;23:31–8.
- 779 52. Büscher P, Gonzatti MI, Hébert L, Inoue N, Pascucci I, Schnauffer A, et al. Equine  
780 trypanosomiasis: Enigmas and diagnostic challenges. Parasites and Vectors. 2019;12:1–8.
- 781 53. Gibson WC, Wilson AJ, Moloo SK. Characterisation of *Trypanosoma* (*Trypanozoon*) *evansi*  
782 from camels in Kenya using isoenzyme electrophoresis. Res Vet Sci. 1983;34:114–8.
- 783 54. Njiru ZK, Constantine CC, Masiga DK, Reid SA, Thompson RCA, Gibson WC.  
784 Characterization of *Trypanosoma evansi* type B. Infect Genet Evol. 2006;6:292–300.
- 785 55. Owange NO, Ogara WO, Affognon H, Peter GB, Kasiiti J, Okuthe S, et al. Occurrence of rift  
786 valley fever in cattle in Ijara district, Kenya. Prev Vet Med. 2014;117:121–8.
- 787 56. Giordani F, Morrison LJ, Rowan TIMG, Koning HPDE, Barrett MP. The animal  
788 trypanosomiasis and their chemotherapy: a review. Parasitology. 2016;:1862–89.
- 789 57. Ana Luiza Alves Rosa Osório, Madruga CR, Desquesnes M, Soares CO, Raquel L, Ribeiro  
790 R. *Trypanosoma* (*Duttonella*) *vivax*: its biology, epidemiology, pathogenesis, and  
791 introduction in the New World - A Review. Mem Inst Oswaldo Cruz. 2008;103:1–13.

792 **Additional file**

793 Additional file 1: Figure S1. PCR products were resolved 1% ethidium-bromide stained agarose  
794 gel (8V for 1.5 hrs) to check for any contamination. The DNA isolated from whole fly was  
795 amplified targeting trypanosomal ITS1 gene. Lane: M 10- bp marker, Bf (reaction buffer), wt  
796 (PCR water), TB (*T. brucei* ILTat 1.4) TV (*T. vivax* IL 2136), TC (*T. congolense* savannah  
797 (IL3000)), and TE (*T. evansi* KETRI 2479), F1- F10 DNA sample from *H. camelina* flies. The  
798 absence of PCR product under Bf, and wt show no contamination from extraction buffer.

799 Additional file 2: Figure S2, Number of *H. camelina* recaptured at the specified distance from  
800 pint of release. Number in parenthesis shows percentage of flies recaptured.

801 Additional file 3: Figure S3. (A) PCR products were resolved 1% ethidium-bromide stained  
802 agarose gel (8V for 1.5 hrs) to check for trypanosomes in blood and lymph node aspirate. The  
803 DNA isolated from blood and lymph node aspirate was amplified targeting trypanosomal ITS1  
804 gene. Lane: M 10- bp marker, -Ve (reaction buffer), TE (*T. evansi* KETRI 2479) TV (*T. vivax* IL  
805 2136), TC (*T. congolense* savannah (IL3000)), and LN\_C1, LN\_C2, DNA sample from two

806 camels lymph node aspirate, B\_C1 and B\_C2 DNA from corresponding blood samples from the  
807 same camel. The result shows both samples of the lymph node aspirate were positive, while  
808 blood samples were negative from the same camel. (B) Five camels blood and lymph node  
809 aspirate were analysed, only camel five lymph node aspirate was positive for *T.vivax* but blood  
810 sample from the same camel was negative.

811 Additional File 2. Supplementary Table 1. Trypanosomes identified based on ITS1 gene  
812 sequence from different host included in Fig.6.
